# Supplementary material
Source: PubMed Central journal article supplement (PMC10208673)
Supplement: NIHMS1897427-supplement-1.pdf [file NIHMS1897427-supplement-1.pdf]

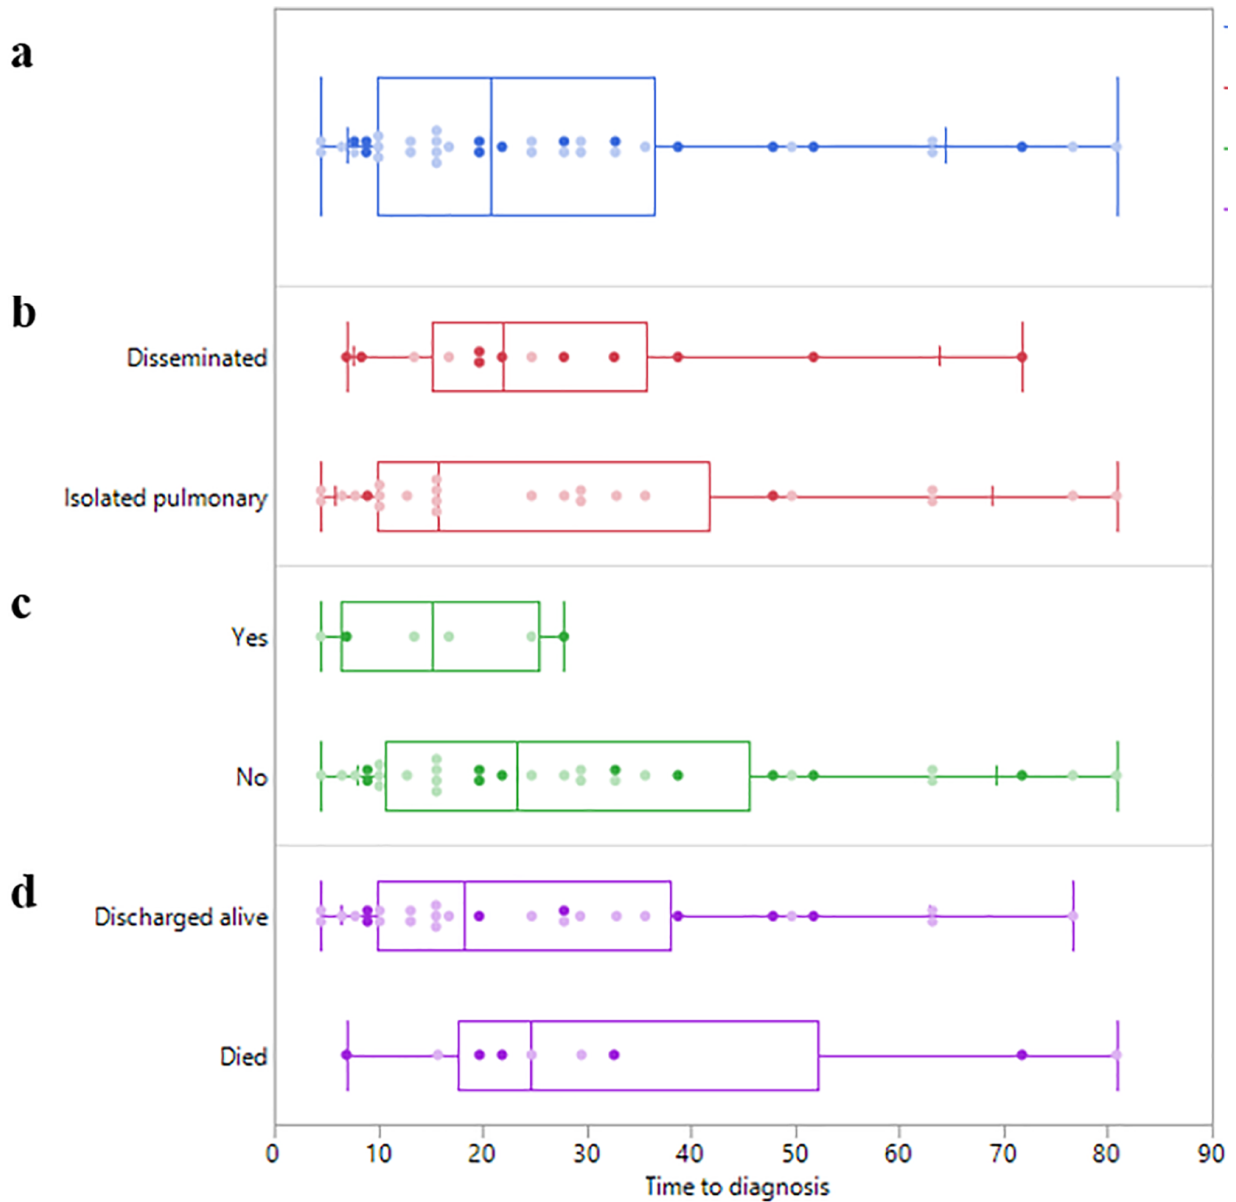

**Supplementary figure** Duration from the initial symptoms to the diagnosis for different patient categories. a: all patients, b: according to the extent of the disease, c: according to presentation with arthralgia or rash, d: in-hospital mortality. Patients who were asymptomatic or did not have an unequivocal symptom start date ( $n=5$ ) were excluded from the analyses.
